# Supplementary material for: A highly selective fluorescent ‘turn-on’ chemosensor for Hg2+based on a phthalazin-hydrazone derivative and its application in human cervical cancer cell imaging
Source: Royal Society of Chemistry journal article supplement (doi:10.1039/c4nj02149e), 2015-01-01
Supplement: c4nj02149e1.pdf [file c4nj02149e1.pdf]

## Supporting Information

### A highly selective fluorescent chemosensor for Hg<sup>2+</sup> based on a hydrazones derivative including phthalazin and their application in human cervical cancer HeLa cells

Dipesh Mahajan<sup>a</sup>, Nilesh Khairnar<sup>a</sup>, Banashree Bondhopadhyay<sup>c</sup>, Suban K.Sahoo<sup>b</sup>, Anupam Basu<sup>c</sup>, Jasminder Singh<sup>d</sup>, Narinder Singh<sup>\*d</sup>, Ratnamala Bendre<sup>\*a</sup>, Anil Kuwar<sup>\*a</sup>

<sup>a</sup>School of Chemical Sciences, North Maharashtra University, Jalgaon- 425001 (MS) India.

Email: [kuwaras@gmail.com](mailto:kuwaras@gmail.com), [bendrer@rediffmail.com](mailto:bendrer@rediffmail.com)

<sup>b</sup>Department of Chemistry, SV National Institute Technology, Surat (Gujarat) India.

<sup>c</sup>Molecular Biology and Human Genetics Laboratory Department of Zoology The University of Burdwan, Burdwan, West Bengal, India.

<sup>d</sup>Department of Chemistry, Indian Institute Technology, Ropar-140001 (Punjab) India.

Email: [nsingh@iitrpr.ac.in](mailto:nsingh@iitrpr.ac.in)

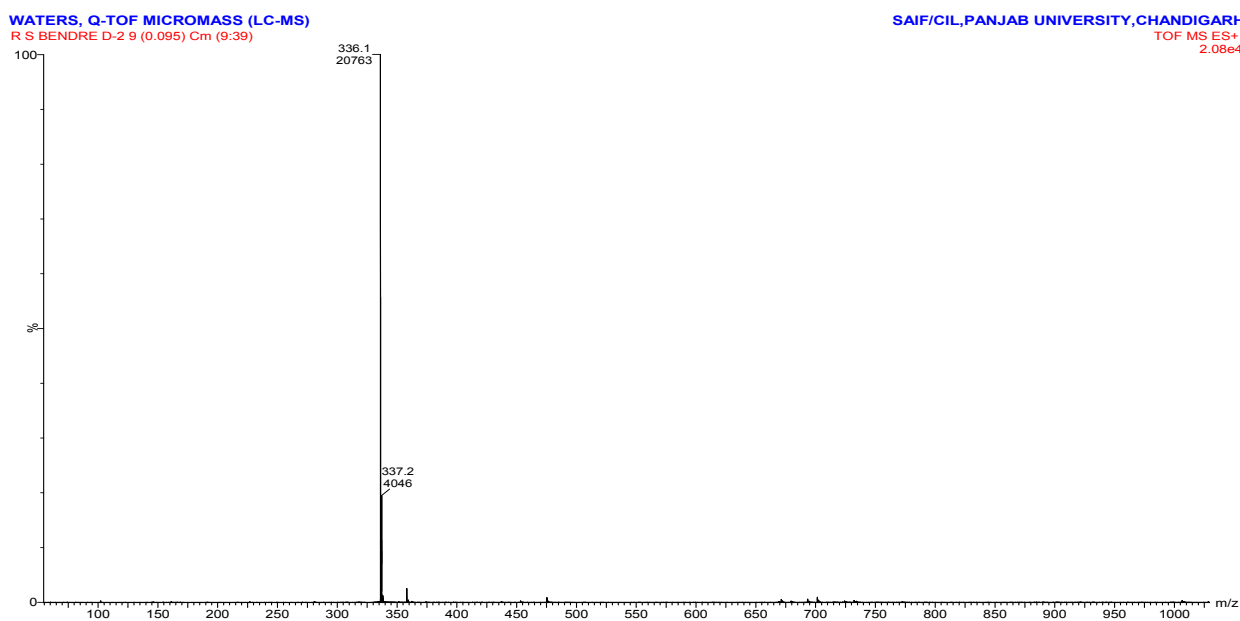

Figure S1: LC-MS Spectra of receptor 1

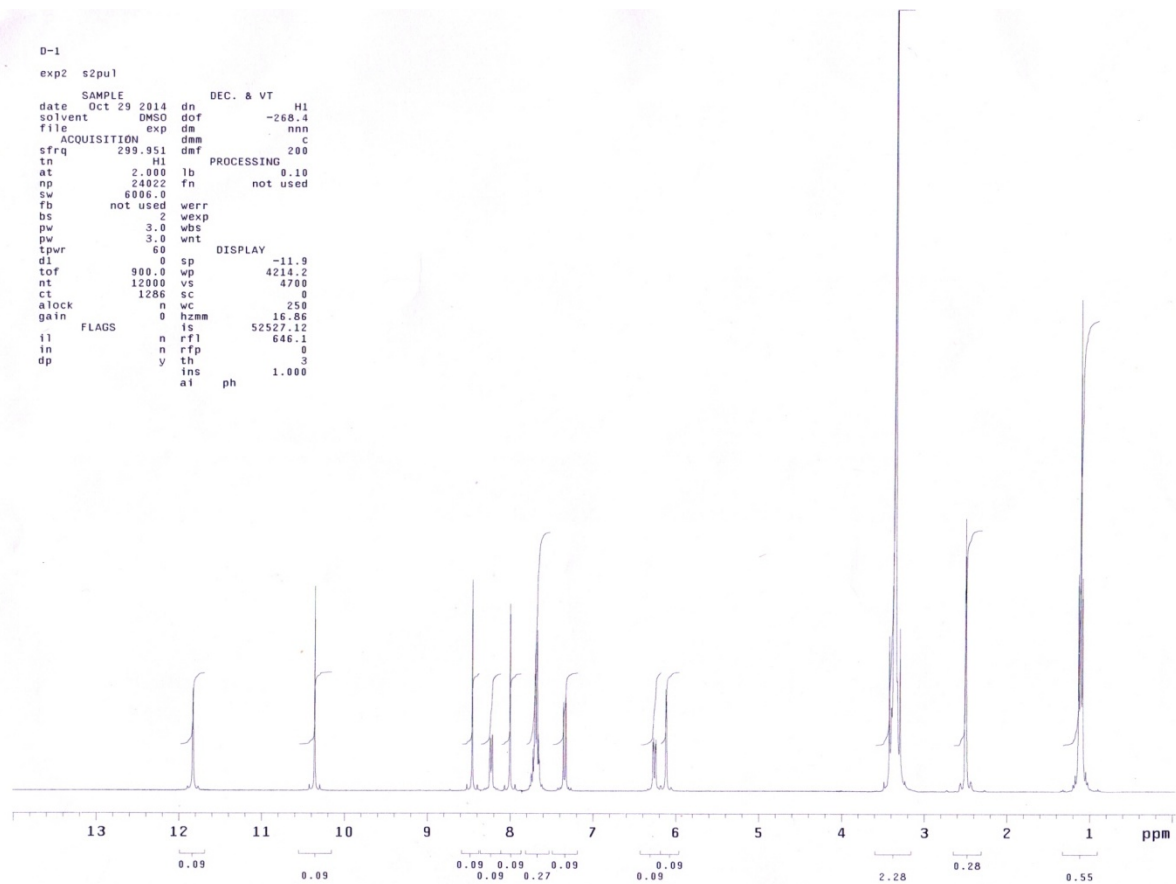

**Figure S2:**  $^1\text{H}$  NMR Spectrum of receptor **1**

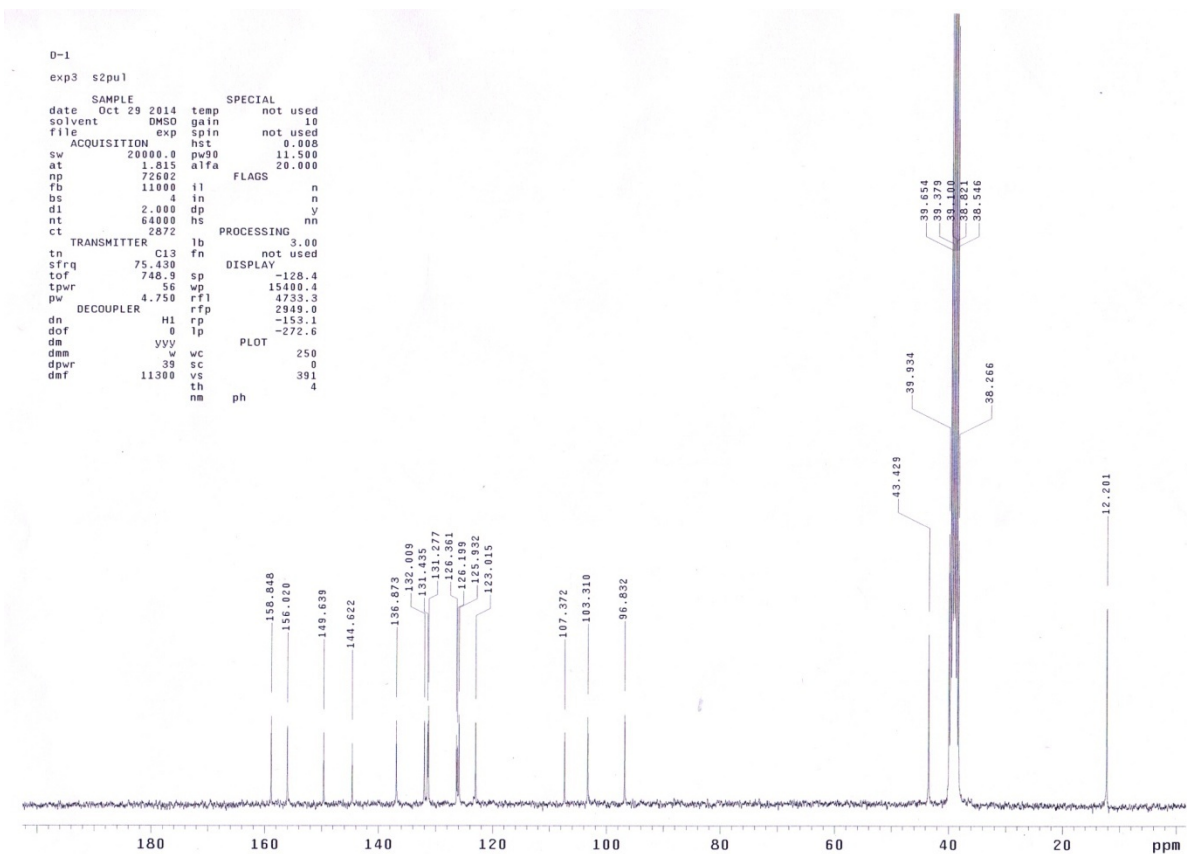

**Figure S3:**  $^{13}\text{C}$  NMR Spectrum of receptor **1**

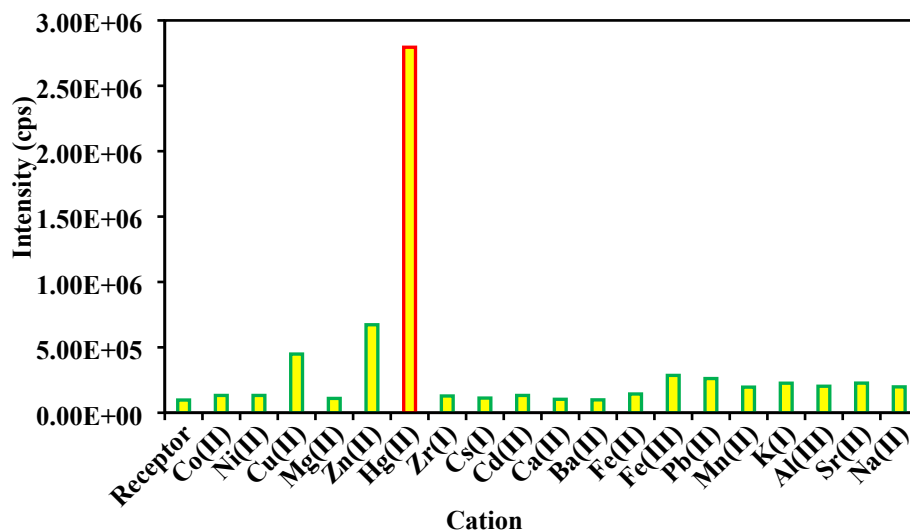

**Figure S4:** Bar diagram showing effect of 1 equivalents of different metal ions on the fluorescent intensity of **1** ( $10\ \mu\text{M}$ ) in DMSO/ $\text{H}_2\text{O}$  (80:20,  $v/v$ ) solution.

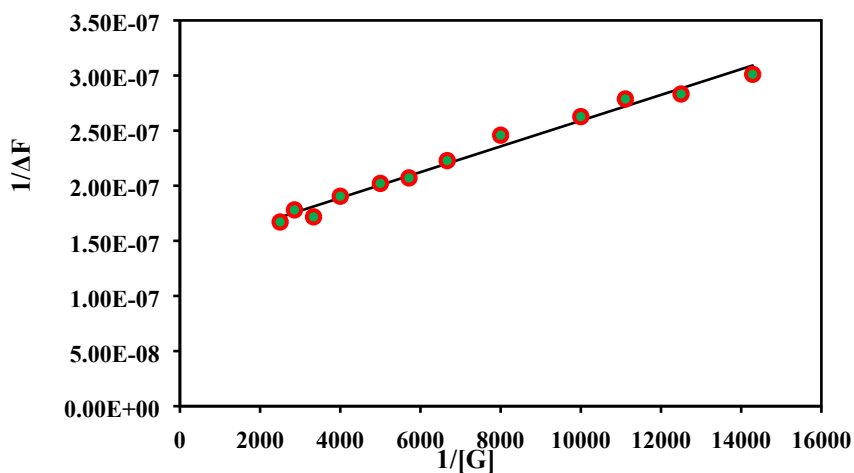

**Figure S5.** Benesi-Hildebrand plot for receptor **1**,  $1/\Delta F$  vs  $1/[Hg^{2+}]$ .

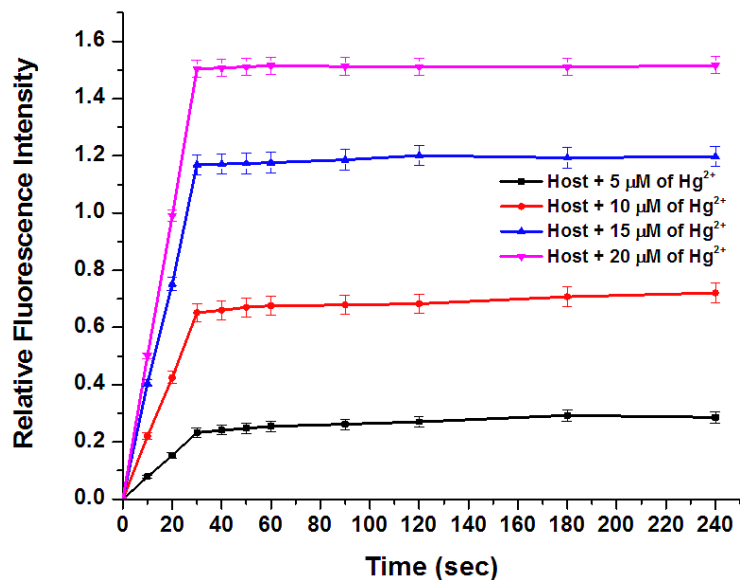

**Figure S6:** Plot of relative fluorescence intensity of **sensor1** and  $Hg^{2+}$  at different concentrations (5, 10, 15 and 20  $\mu M$ ) as a function of time (seconds).

|                        |                 |                 |                 |                |                        |                |                |
|------------------------|-----------------|-----------------|-----------------|----------------|------------------------|----------------|----------------|
| Blank<br>Maxima<br>460 | <b>9.66E+04</b> | <b>9.79E+04</b> | <b>1.02E+05</b> | SD of<br>Blank | Slope<br>from<br>Graph | LOD            | LOQ            |
|                        |                 |                 |                 | 2.60E+03       | 3.29E+00               | 2.61E-<br>09   | 7.91E-<br>09   |
|                        |                 |                 |                 |                |                        | <b>26.1 nM</b> | <b>79.1 nM</b> |

Table S1: Calculation of Detection limit using IUPAC  $3\sigma$  method and LOQ measurement using  $10\sigma$  method
